# Supplementary material
Source: Springer Nature journal article supplement (https://www.springermedizin.de/resource/supplementary/12890_2012_416_MOESM6_ESM.pdf/9505182)

## (a) Difference of healthcare utilization costs

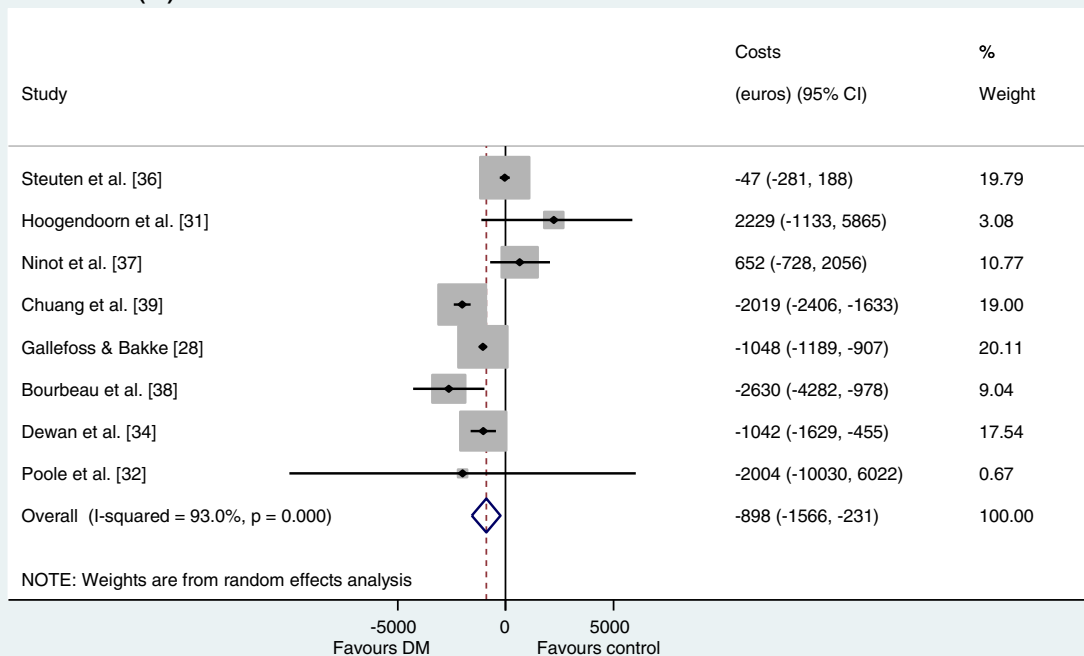

## (b) Difference in hospitalization costs

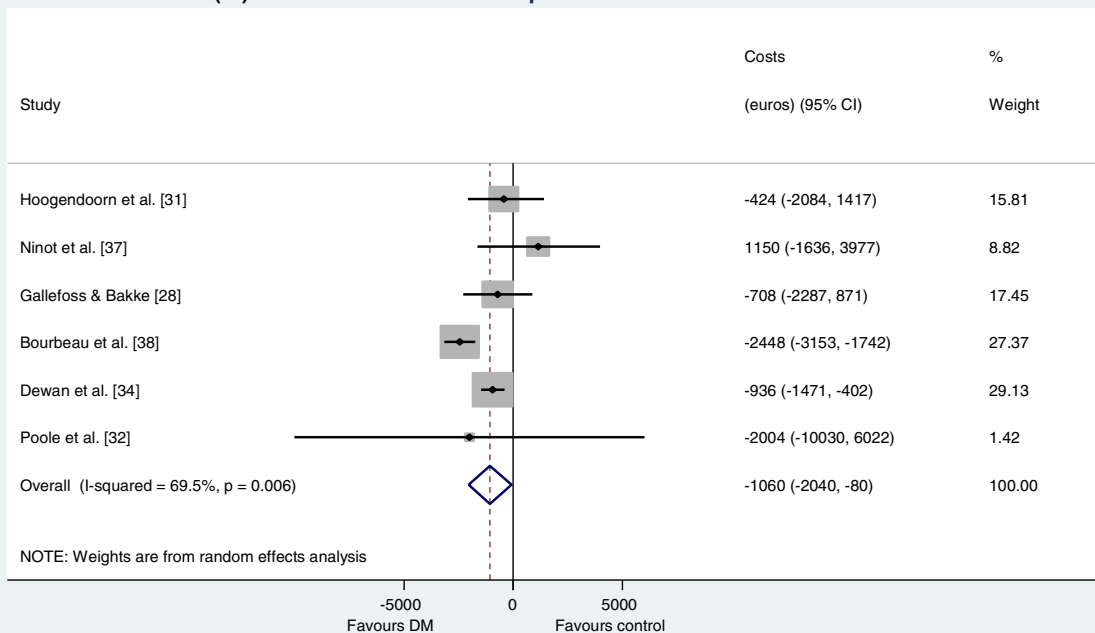

Supplement: MOESM6 [file 9505182]
